# Supplementary material
Source: PubMed Central journal article supplement (PMC8170589)

**Supplemental Figure 1.** Relationships between Pain Stage and Alzheimer's-related Cortical Thickness in Temporal Lobe Regions by Ethnicity/Race

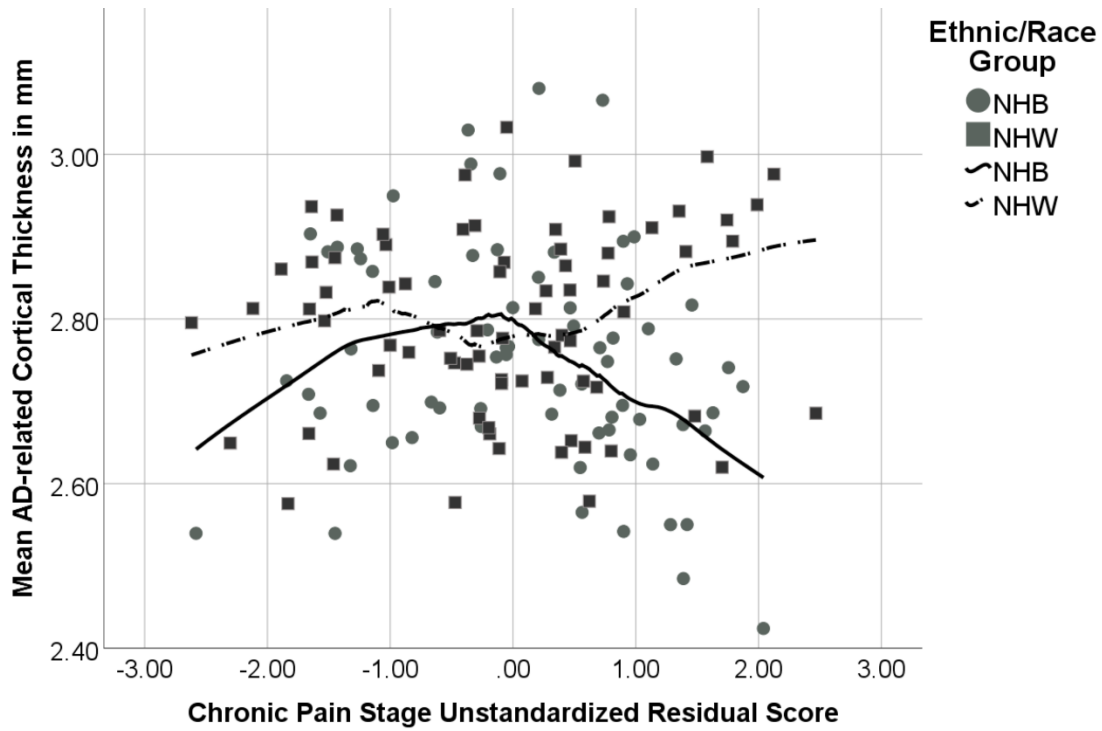

Note: Data fit using local regression (LOESS) with a tricube weight, fitting 50% of points. Chronic Pain Stage unstandardized residual score is adjusted for study site, age, BMI, mean z score of education level and income level, and MoCA.

**Supplemental Figure 2.** Differences in Alzheimer’s-related Cortical Thickness in Temporal Lobe Regions by Ethnic/Race Group and Chronic Pain Stage

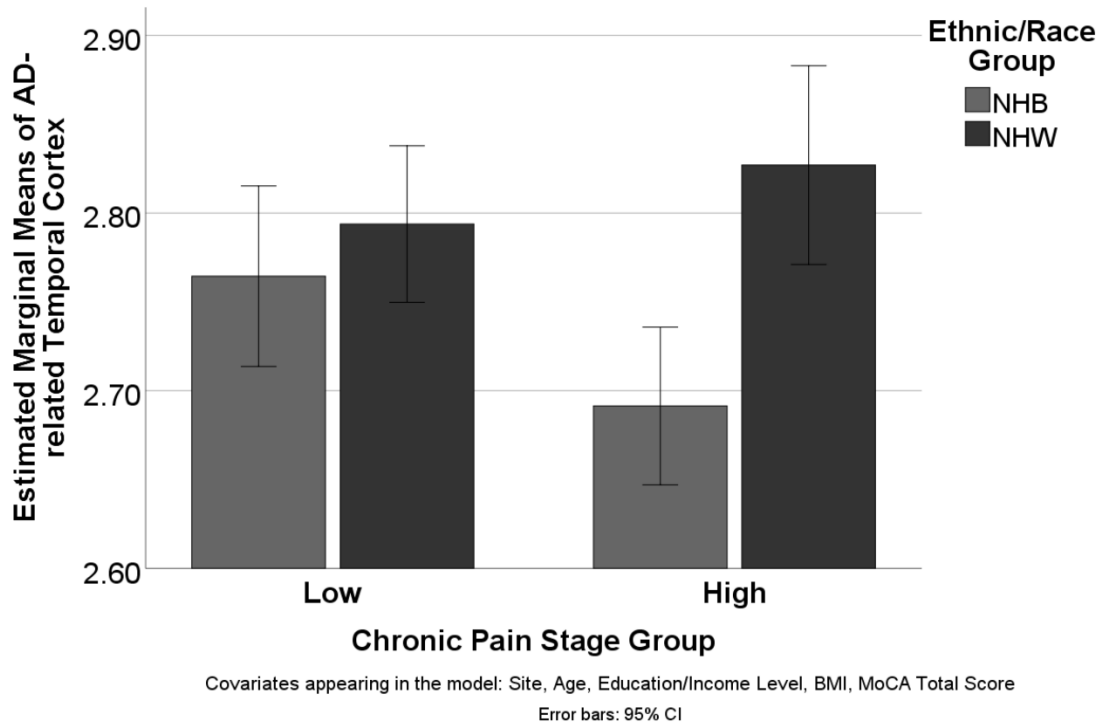

Note: NHB adults with high chronic pain stage ( $n = 31$ ) had thinner temporal lobe cortex than the other three groups (NHB low [ $n = 20$ ], NHW high [ $n = 17$ ], NHW low [ $n = 32$ ];  $p$  values  $< 0.025$ ), which did not differ from each other ( $p$  values  $> 0.192$ ).

Supplemental Figure 3. Differences in MoCA Total Scores by Chronic Pain Stage (A) and Pain Stage by Ethnic/Race Group (B)

A. Differences by Pain Stage Group

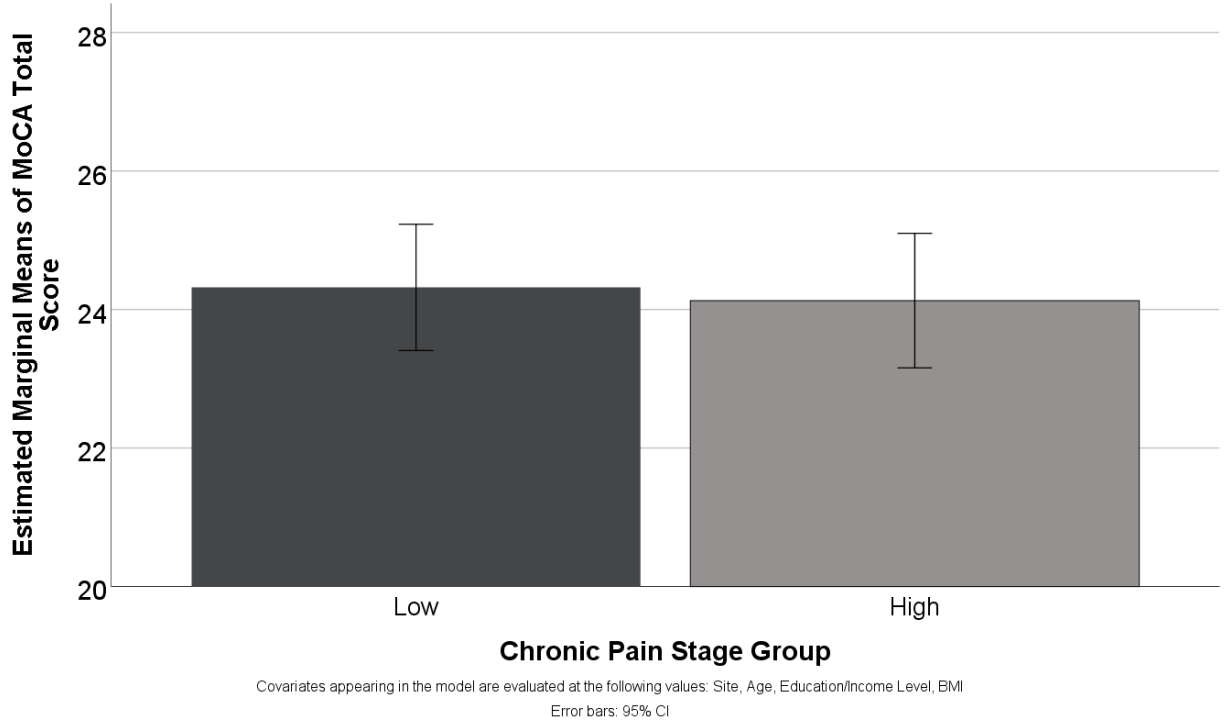

B. Differences by Pain Stage Group and Ethnicity/Race

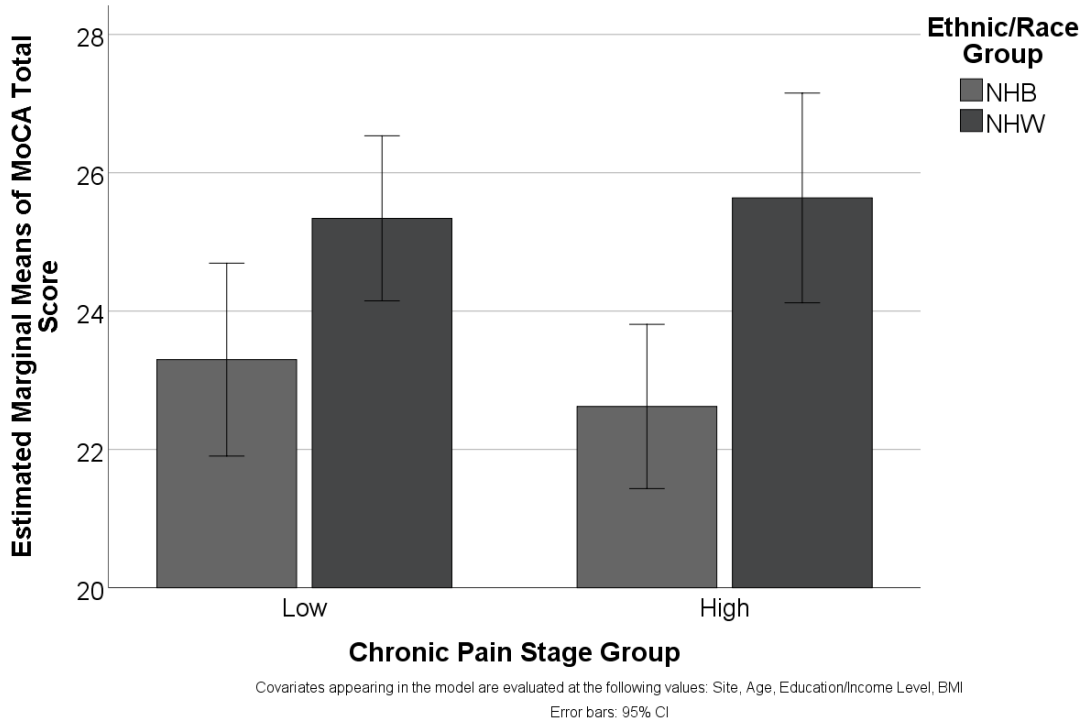

Supplement: NIHMS1707352-supplement-1.pdf [file NIHMS1707352-supplement-1.pdf]
